# Supplementary material
Source: PubMed Central journal article supplement (PMC1895549)
Supplement: blood_blood-2006-04-015859_1.pdf [file blood_blood-2006-04-015859_1.pdf]

| Patients     | Gestational Age (Weeks) | Postnatal Age (Months) | HbF/(HbF + HbA) (Percent) | Hemoglobin (g/dl) | MCV (fL)   | ARC (10E6/uL) |
|--------------|-------------------------|------------------------|---------------------------|-------------------|------------|---------------|
| <b>CB 1</b>  | <b>37</b>               | <b>0</b>               | <b>82.2</b>               | <b>16.4</b>       | <b>111</b> | <b>172</b>    |
| <b>CB 2</b>  | <b>38</b>               | <b>0</b>               | <b>87.2</b>               | <b>17.8</b>       | <b>117</b> | <b>152</b>    |
| <b>CB 3</b>  | <b>41</b>               | <b>0</b>               | <b>78.1</b>               | <b>14.0</b>       | <b>102</b> | <b>163</b>    |
| <b>CB 4</b>  | <b>NA</b>               | <b>0</b>               | <b>67.4</b>               | <b>16.3</b>       | <b>112</b> | <b>120</b>    |
| <b>CB 5</b>  | <b>NA</b>               | <b>0</b>               | <b>81.1</b>               | <b>15.7</b>       | <b>109</b> | <b>216</b>    |
| <b>IN 1</b>  | <b>39</b>               | <b>0.33</b>            | <b>81.3</b>               | <b>14.3</b>       | <b>104</b> | <b>80</b>     |
| <b>IN 2</b>  | <b>NA</b>               | <b>0.40</b>            | <b>76.4</b>               | <b>12.3</b>       | <b>99</b>  | <b>82</b>     |
| <b>IN 3</b>  | <b>39</b>               | <b>0.43</b>            | <b>90.9</b>               | <b>12.8</b>       | <b>93</b>  | <b>84</b>     |
| <b>IN 4</b>  | <b>35</b>               | <b>0.83</b>            | <b>86.8</b>               | <b>9.60</b>       | <b>99</b>  | <b>64</b>     |
| <b>IN 5</b>  | <b>NA</b>               | <b>2.3</b>             | <b>34.6</b>               | <b>11.5</b>       | <b>86</b>  | <b>53</b>     |
| <b>IN 6</b>  | <b>NA</b>               | <b>2.6</b>             | <b>29.7</b>               | <b>10.4</b>       | <b>87</b>  | <b>44</b>     |
| <b>IN 7</b>  | <b>NA</b>               | <b>2.6</b>             | <b>43.5</b>               | <b>10.0</b>       | <b>85</b>  | <b>40</b>     |
| <b>IN 8</b>  | <b>33</b>               | <b>4</b>               | <b>26.7</b>               | <b>11.0</b>       | <b>78</b>  | <b>55</b>     |
| <b>IN 9</b>  | <b>NA</b>               | <b>6</b>               | <b>7.6</b>                | <b>11.4</b>       | <b>76</b>  | <b>54</b>     |
| <b>IN 10</b> | <b>34</b>               | <b>8</b>               | <b>2.8</b>                | <b>13.4</b>       | <b>78</b>  | <b>39</b>     |
| <b>IN 11</b> | <b>42</b>               | <b>9</b>               | <b>3.7</b>                | <b>10.3</b>       | <b>75</b>  | <b>42</b>     |
| <b>IN 12</b> | <b>NA</b>               | <b>9</b>               | <b>2.1</b>                | <b>11.5</b>       | <b>79</b>  | <b>43</b>     |
| <b>IN 13</b> | <b>26</b>               | <b>35</b>              | <b>2.1</b>                | <b>13.3</b>       | <b>76</b>  | <b>51</b>     |
| <b>AB 1</b>  | <b>NA</b>               | <b>NA</b>              | <b>&lt;0.5</b>            | <b>WNL</b>        | <b>NA</b>  | <b>NA</b>     |
| <b>AB 2</b>  | <b>NA</b>               | <b>NA</b>              | <b>&lt;0.5</b>            | <b>WNL</b>        | <b>NA</b>  | <b>NA</b>     |
| <b>AB 3</b>  | <b>NA</b>               | <b>NA</b>              | <b>&lt;0.5</b>            | <b>WNL</b>        | <b>NA</b>  | <b>NA</b>     |
| <b>AB 4</b>  | <b>NA</b>               | <b>NA</b>              | <b>&lt;0.5</b>            | <b>WNL</b>        | <b>NA</b>  | <b>NA</b>     |
| <b>AB 5</b>  | <b>NA</b>               | <b>NA</b>              | <b>&lt;0.5</b>            | <b>WNL</b>        | <b>NA</b>  | <b>NA</b>     |
| IN 14        | NA                      | 0.03                   | 89.4                      | 14.9              | 100        | NA            |
| IN 15        | NA                      | 0.03                   | 90.0                      | 14.7              | 99         | NA            |
| IN 16        | NA                      | 0.03                   | 64.0                      | 15.5              | 105        | NA            |
| IN 17        | NA                      | 0.03                   | 74.7                      | 17.5              | 111        | NA            |
| IN 18        | NA                      | 0.07                   | 93.5                      | 13.3              | 109        | NA            |
| IN 19        | NA                      | 0.10                   | 91.4                      | 17.5              | 111        | NA            |
| IN 20        | NA                      | 0.10                   | 73.6                      | 13.3              | 102        | NA            |
| IN 21        | NA                      | 0.13                   | 88.6                      | 15.8              | 101        | NA            |
| IN 22        | NA                      | 0.43                   | 78.5                      | 20.3              | 102        | NA            |
| IN 23        | NA                      | 0.49                   | 80.5                      | 14.3              | 102        | NA            |
| IN 24        | NA                      | 0.72                   | 68.7                      | 15.7              | 108        | NA            |
| IN 25        | NA                      | 1.05                   | 8.4                       | 12.1              | 97         | NA            |
| IN 26        | NA                      | 1.08                   | 72.0                      | 12.3              | 90         | NA            |
| IN 27        | NA                      | 1.35                   | 62.0                      | 11.7              | 88         | NA            |
| IN 28        | NA                      | 1.55                   | 54.8                      | 11.0              | 111        | NA            |
| IN 29        | NA                      | 1.58                   | 61.6                      | 10.7              | 94         | NA            |
| IN 30        | NA                      | 1.61                   | 4.7                       | 10.9              | 84         | NA            |
| IN 31        | NA                      | 1.68                   | 46.3                      | 11.0              | 89         | NA            |
| IN 32        | NA                      | 1.97                   | 39.8                      | 9.2               | 97         | NA            |
| IN 33        | NA                      | 2.17                   | 27.9                      | 11.6              | 86         | NA            |
| IN 34        | NA                      | 2.27                   | 49.5                      | 9.7               | 84         | NA            |
| IN 35        | NA                      | 2.37                   | 5.5                       | 11.7              | 92         | NA            |
| IN 36        | NA                      | 2.40                   | 46.4                      | 9.7               | 81         | NA            |
| IN 37        | NA                      | 2.79                   | 41.4                      | 12.0              | 86         | NA            |
| IN 38        | NA                      | 3                      | 3.32                      | 14.1              | 86         | NA            |
| IN 39        | NA                      | 3                      | 25.1                      | 11.5              | 91         | NA            |
| IN 40        | NA                      | 3                      | 81.6                      | 12.7              | 100        | NA            |
| IN 41        | NA                      | 3                      | 25.9                      | 10.3              | 85         | NA            |
| IN 42        | NA                      | 3                      | 10.3                      | 9.1               | 100        | NA            |
| IN 43        | NA                      | 3                      | 23.8                      | 9.8               | 84         | NA            |
| IN 44        | NA                      | 3                      | 26.5                      | 9.2               | 84         | NA            |
| IN 45        | NA                      | 4                      | 5.3                       | 12.0              | 76         | NA            |
| IN 46        | NA                      | 4                      | 6.7                       | 10.8              | 81         | NA            |
| IN 47        | NA                      | 4                      | 8.0                       | 10.9              | 80         | NA            |
| IN 48        | NA                      | 4                      | 4.6                       | 9.9               | 89         | NA            |
| IN 49        | NA                      | 4                      | 7.5                       | 9.5               | 78         | NA            |
| IN 50        | NA                      | 4                      | 8.1                       | 12.4              | 87         | NA            |
| IN 51        | NA                      | 4                      | 9.0                       | 11.4              | 78         | NA            |
| IN 52        | NA                      | 4                      | 9.0                       | 11.1              | 92         | NA            |
| IN 53        | NA                      | 4                      | 20.8                      | 12.6              | 100        | NA            |
| IN 54        | NA                      | 4                      | 20.5                      | 9.7               | 92         | NA            |
| IN 55        | NA                      | 5                      | 10.4                      | 13.1              | 84         | NA            |

|       |    |    |      |      |    |    |
|-------|----|----|------|------|----|----|
| IN 56 | NA | 5  | 18.3 | 11.5 | 92 | NA |
| IN 57 | NA | 5  | 5.4  | 10.3 | 78 | NA |
| IN 58 | NA | 5  | 8.1  | 12.6 | 71 | NA |
| IN 59 | NA | 6  | 6.4  | 11.7 | 81 | NA |
| IN 60 | NA | 6  | 3.8  | 11.3 | 72 | NA |
| IN 61 | NA | 6  | 2.3  | 10.9 | 82 | NA |
| IN 62 | NA | 6  | 3.8  | 9.6  | 84 | NA |
| IN 63 | NA | 6  | 4.3  | 12.2 | 76 | NA |
| IN 64 | NA | 6  | 3.8  | 13.6 | 89 | NA |
| IN 65 | NA | 7  | 4.1  | 11.0 | 80 | NA |
| IN 66 | NA | 7  | 3.0  | 11.6 | 84 | NA |
| IN 67 | NA | 8  | 1.8  | 11.1 | 81 | NA |
| IN 68 | NA | 8  | 7.3  | 12.4 | 80 | NA |
| IN 69 | NA | 9  | 5.4  | 11.3 | 83 | NA |
| IN 70 | NA | 9  | 2.6  | 10.8 | 76 | NA |
| IN 71 | NA | 9  | 6.4  | 12.0 | 83 | NA |
| IN 72 | NA | 10 | 15.0 | 13.0 | 89 | NA |
| IN 73 | NA | 10 | 4.4  | 11.7 | 77 | NA |
| IN 74 | NA | 10 | 5.9  | 13.0 | 74 | NA |
| IN 75 | NA | 11 | 7.0  | 13.4 | 88 | NA |
| IN 76 | NA | 12 | 1.9  | 12.7 | 83 | NA |
| IN 77 | NA | 12 | 3.6  | 10.7 | 75 | NA |
| IN 78 | NA | 12 | 3.6  | 11.3 | 77 | NA |
| IN 79 | NA | 12 | 2.4  | 12.4 | 75 | NA |
| IN 80 | NA | 12 | 3.4  | 11.8 | 80 | NA |
| IN 81 | NA | 12 | 21.4 | 11.3 | 75 | NA |
| IN 82 | NA | 12 | 3.8  | 10.9 | 80 | NA |
| IN 83 | NA | 14 | 1.8  | 11.8 | 84 | NA |
| IN 84 | NA | 18 | 1.4  | 11.9 | 86 | NA |
| IN 85 | NA | 18 | 1.6  | 13.3 | 83 | NA |
| IN 86 | NA | 20 | 2.0  | 10.6 | 85 | NA |
| IN 87 | NA | 22 | 3.1  | 12.3 | NA | NA |
| IN 88 | NA | 25 | 0.8  | 11.1 | NA | NA |
| IN 89 | NA | 27 | 4.4  | 12.8 | 78 | NA |
| IN 90 | NA | 29 | 3.5  | 11.0 | 94 | NA |
| IN 91 | NA | 31 | 1.9  | 11.7 | 75 | NA |
| IN 92 | NA | 36 | 3.0  | 11.8 | 81 | NA |
| IN 93 | NA | 36 | 0.7  | 11.7 | NA | NA |
| IN 94 | NA | 36 | 2.1  | 12.0 | 85 | NA |
| IN 95 | NA | 48 | 1.3  | 13.6 | 80 | NA |
| IN 96 | NA | 48 | 1.8  | 12.0 | 83 | NA |
| IN 97 | NA | 60 | 2.3  | 14.0 | 81 | NA |
| IN 98 | NA | 60 | 1.0  | 10.6 | 86 | NA |
| IN 99 | NA | 60 | 1.0  | 10.2 | 70 | NA |

NA - Not Available; WNL - Within normal limits; ARC - Absolute Reticulocyte Count
